# Supplementary material
Source: PubMed Central journal article supplement (PMC6295847)
Supplement: ml8b00504_si_001.pdf [file ml8b00504_si_001.pdf]

## Supporting Information

# *In vitro* Ligand Binding Kinetics Explains the Pharmacokinetics of [<sup>18</sup>F]FE-PE2I in Dopamine Transporter PET Imaging

Siim Kukk,<sup>†,‡</sup> Olavi Loog,<sup>‡</sup> Jukka-Veli Hiltunen,<sup>‡</sup> and Jaak Järv<sup>†,‡</sup>

<sup>†</sup> Department of Organic Chemistry, Institute of Chemistry, University of Tartu, Ravila 14a, 50411, Tartu, Estonia

<sup>‡</sup> PharmaSynth AS, Teaduspargi 7, 51014, Tartu, Estonia

## Methods

The PE2I and FE-PE2I samples were kindly donated by PharmaSynth AS. The buffer components were purchased from either Sigma-Aldrich or Lach-ner. The ScintiSafe 3 scintillation cocktail was used for counting the samples. Whatman GF/B filters were used for the filtration assays. The Wallac 1219 Rackbeta liquid scintillation counter was used to measure the radioactivity of the samples. The inhibition constant of FE-PE2I was calculated from the corresponding IC<sub>50</sub> value using the Cheng–Prusoff equation,<sup>1</sup> and 4.8 nM and 3 nM were used as K<sub>d</sub> and concentration of radioligand,<sup>2</sup> respectively. All kinetic curves of reporter-ligand binding followed the pseudo-first-order rate equation and were fitted to a one-phase exponential association function. The radioligand binding rate constant versus unlabeled ligand concentration plots were analyzed as previously described.<sup>3</sup> The data were analyzed with the GraphPad Prism 4 software package.

**Ligand binding.** Striata from two-month old male C57BL/6 mice were rapidly dissected, weighed, frozen, and stored at –80 °C. The tissue was suspended in an ice-cold buffer (120 mM NaCl, 5 mM KCl, 30 mM HEPES, pH 7.4), sonicated using an ultrasound homogenizer (Bandelin SONOPLUS; 3×15 sec), and centrifuged at 30,000 g for 15 min at 0 °C. The supernatant was discarded, and the remaining pellet was resuspended in an ice-cold buffer and homogenized again. This procedure was repeated three more times to yield a final membrane suspension, which was divided into aliquots and stored at –80 °C until needed. The final membrane concentration was approximately 4 mg of wet tissue per mL. [<sup>3</sup>H]PE2I, with a specific activity of 69.4 Ci/mmol, was used at a final concentration of 3 nM throughout the displacement and kinetic experiments. Inhibition constants were determined by radioligand displacement assays. The membrane suspension (150 µL) was preincubated for 10 min at 25 °C with the unlabeled ligand solution (50 µL) at various concentrations before adding 15 nM [<sup>3</sup>H]PE2I (50 µL, final concentration 3 nM) and incubating for 1 h at 25 °C. The kinetic experiments were conducted by adding 9 nM [<sup>3</sup>H]PE2I (0.5 mL) and unlabeled ligand solution (at various concentrations) to the membrane suspension (1 mL) in a thermostated cuvette maintained at 25 °C. Aliquots were taken at predetermined time intervals. The reaction was terminated by the addition of an ice-cold buffer (20 mM potassium phosphate, 100 mM NaCl, pH 7.4), filtration through GF/B filters (presoaked in 0.3% polyethylene imine solution) and washing with an ice-cold buffer (5 mL). The filters were air dried and

transferred into scintillation vials, and then the scintillation cocktail was added. The vials were then shaken for 12 h before measuring the radioactivity using a liquid scintillation counter.

**Kinetic Analysis** A systematic kinetic study of the FE-PE2I interaction with DAT sites in striatum membrane fragments was performed by using the method of kinetic analysis previously described.<sup>3,4</sup> In these experiments, the time-course of [<sup>3</sup>H]PE2I binding with membrane fragments was monitored in the presence of various concentrations of non-labeled FE-PE2I (Figure 1), and the dependence of the observed rate constants  $k_{\text{obs}}$  upon FE-PE2I concentration was analyzed (Figure 1). The  $k_{\text{obs}}$  values increased in the presence of FE-P2I, and this hyperbolic plot provided evidence that FE-PE2I is also able to initiate the slow isomerization of the ligand-DAT complex, as shown in Scheme 3. From the same  $k_{\text{obs}}$  versus [FE-PE2I] plot (Figure 1), the kinetic parameters  $K_L$ ,  $k_i$  and  $k_{-i}$  were calculated for this ligand by using the rate equation

$$k_{\text{obs}} = \frac{k_i[L]}{K_L + [L]} + C \quad \text{Eq. 2}$$

where  $k_{\text{obs}}$  is the observed rate constant of a binding reaction,  $k_i$  is the on-rate constant of the isomerization of unlabeled ligand and DAT, [L] is the concentration of the ligand,  $K_L$  is the equilibrium constant of initial binding and C can be calculated as follows

$$C = \frac{k_i^*[L^*]}{K_L^* + [L^*]} + \frac{k_{-i} + k_{-i}^*}{2} \quad \text{Eq. 3}$$

where  $k_i^*$  is the on-rate constant of isomerization of radioligand-DAT complex,  $k_{-i}^*$  and  $k_{-i}$  are the off-rate constants of unlabeled ligand and radioligand, respectively, [L\*] is the concentration of the radioligand, and  $K_L^*$  is the equilibrium constant of initial binding of the radioligand as previously described.<sup>3</sup>

- (1) Yung-Chi, C.; Prusoff, W. H. Relationship between the Inhibition Constant (KI) and the Concentration of Inhibitor Which Causes 50 per Cent Inhibition (I50) of an Enzymatic Reaction. *Biochem. Pharmacol.* **1973**, 22 (23), 3099–3108.
- (2) Kukk, S.; Stepanov, V.; Järvi, J. Thermal Stability of Dopamine Transporters. *J. Membr. Biol.* **2015**, 248 (4), 775–781.
- (3) Kukk, S.; Järvi, J. Differentiating between Drugs with Short and Long Residence Times. *Medchemcomm* **2016**, 7 (8), 1654–1656.
- (4) Kukk, S.; Järvi, J. Small Structural Changes at the N -Position of the Tropane Core Control the Mechanism of Nortropane Derivatives Binding to Dopamine Transporter. *ChemistrySelect* **2018**, 3 (23), 6581–6584.
